# Supplementary material
Source: Elsevier journal article supplement (https://authors.library.caltech.edu/75011/6/mmc5.xlsx)
Supplement: mmc5 [file mmc5.xlsx]

## Sheet: Table S2 overrep_BP
	ion channel	cuticle	redox
Analysis Type:	PANTHER Overrepresentation Test (release 20160715)
Annotation Version and Release Date:	GO Ontology database Released 2016-06-22
Analyzed List:	enrichment_test_input.csv (Drosophila melanogaster)
Reference List:	control_genes (Drosophila melanogaster)
Bonferroni correction:	TRUE
GO biological process complete	control_genes - REFLIST (12753)	enrichment_test_input.csv (1407)	enrichment_test_input.csv (expected)	enrichment_test_input.csv (over/under)	enrichment_test_input.csv (fold Enrichment)	enrichment_test_input.csv (P-value)
mitochondrial translation (GO:0032543)	21	14	2.32	+	6.04	0.000437
mitochondrion organization (GO:0007005)	138	42	15.23	+	2.76	2.57e-05
cellular component organization (GO:0016043)	2350	195	259.27	-	0.75	0.00768
cellular component organization or biogenesis (GO:0071840)	2400	198	264.78	-	0.75	0.00386
translation (GO:0006412)	279	68	30.78	+	2.21	7.95e-06
cellular macromolecule metabolic process (GO:0044260)	2166	143	238.97	-	0.6	7.25e-10
peptide biosynthetic process (GO:0043043)	285	68	31.44	+	2.16	1.8e-05
peptide metabolic process (GO:0006518)	336	71	37.07	+	1.92	0.000835
organonitrogen compound metabolic process (GO:1901564)	845	166	93.23	+	1.78	2.42e-09
cellular amide metabolic process (GO:0043603)	348	75	38.39	+	1.95	0.000183
organonitrogen compound biosynthetic process (GO:1901566)	477	100	52.63	+	1.9	4.7e-06
amide biosynthetic process (GO:0043604)	289	68	31.88	+	2.13	3.06e-05
potassium ion transport (GO:0006813)	38	16	4.19	+	3.82	0.0221
metal ion transport (GO:0030001)	141	37	15.56	+	2.38	0.00609
cation transport (GO:0006812)	140	36	15.45	+	2.33	0.0128
ion transport (GO:0006811)	220	55	24.27	+	2.27	0.000114
monovalent inorganic cation transport (GO:0015672)	315	77	34.75	+	2.22	6.26e-07
transmembrane transport (GO:0055085)	389	73	42.92	+	1.7	0.0346
cellular respiration (GO:0045333)	73	26	8.05	+	3.23	0.000958
energy derivation by oxidation of organic compounds (GO:0015980)	84	29	9.27	+	3.13	0.000394
generation of precursor metabolites and energy (GO:0006091)	116	34	12.8	+	2.66	0.00146
oxidation-reduction process (GO:0055114)	478	92	52.74	+	1.74	0.000928
single-organism metabolic process (GO:0044710)	1289	195	142.21	+	1.37	0.0133
ATP metabolic process (GO:0046034)	80	24	8.83	+	2.72	0.0445
purine ribonucleoside triphosphate metabolic process (GO:0009205)	84	25	9.27	+	2.7	0.0342
ribonucleoside triphosphate metabolic process (GO:0009199)	85	25	9.38	+	2.67	0.0415
nucleobase-containing compound metabolic process (GO:0006139)	1114	64	122.9	-	0.52	2.53e-06
organic cyclic compound metabolic process (GO:1901360)	1264	87	139.45	-	0.62	0.00109
heterocycle metabolic process (GO:0046483)	1177	74	129.85	-	0.57	5.37e-05
cellular aromatic compound metabolic process (GO:0006725)	1221	78	134.71	-	0.58	5.96e-05
purine nucleoside triphosphate metabolic process (GO:0009144)	84	25	9.27	+	2.7	0.0342
chitin-based cuticle development (GO:0040003)	187	45	20.63	+	2.18	0.00503
single-organism developmental process (GO:0044767)	3041	266	335.5	-	0.79	0.0129
Unclassified (UNCLASSIFIED)	2536	302	279.79	+	1.08	0
positive regulation of cellular process (GO:0048522)	970	67	107.02	-	0.63	0.0314
positive regulation of biological process (GO:0048518)	1116	76	123.12	-	0.62	0.00368
biological regulation (GO:0065007)	3464	312	382.17	-	0.82	0.0273
regulation of biological process (GO:0050789)	3137	263	346.1	-	0.76	0.000188
regulation of cellular process (GO:0050794)	2905	231	320.5	-	0.72	5.95e-06
generation of neurons (GO:0048699)	866	58	95.54	-	0.61	0.0366
neurogenesis (GO:0022008)	1343	83	148.17	-	0.56	1.86e-06
nervous system development (GO:0007399)	1500	98	165.49	-	0.59	4.01e-06
system development (GO:0048731)	2169	162	239.3	-	0.68	1.47e-05
cell differentiation (GO:0030154)	2128	157	234.78	-	0.67	8.63e-06
cellular developmental process (GO:0048869)	2197	160	242.39	-	0.66	1.6e-06
positive regulation of macromolecule metabolic process (GO:0010604)	510	28	56.27	-	0.5	0.0464
regulation of macromolecule metabolic process (GO:0060255)	1404	78	154.9	-	0.5	1.61e-09
regulation of metabolic process (GO:0019222)	1557	104	171.78	-	0.61	6.81e-06
regulation of transcription from RNA polymerase II promoter (GO:0006357)	462	24	50.97	-	0.47	0.0414
regulation of transcription, DNA-templated (GO:0006355)	867	44	95.65	-	0.46	2.68e-06
regulation of cellular macromolecule biosynthetic process (GO:2000112)	976	51	107.68	-	0.47	7e-07
regulation of cellular biosynthetic process (GO:0031326)	1027	60	113.31	-	0.53	2.47e-05
regulation of biosynthetic process (GO:0009889)	1028	61	113.42	-	0.54	4.59e-05
regulation of cellular metabolic process (GO:0031323)	1445	90	159.42	-	0.56	5.8e-07
regulation of macromolecule biosynthetic process (GO:0010556)	979	51	108.01	-	0.47	5.78e-07
regulation of gene expression (GO:0010468)	1106	63	122.02	-	0.52	1.99e-06
regulation of nucleic acid-templated transcription (GO:1903506)	867	44	95.65	-	0.46	2.68e-06
regulation of RNA biosynthetic process (GO:2001141)	867	44	95.65	-	0.46	2.68e-06
regulation of RNA metabolic process (GO:0051252)	944	45	104.15	-	0.43	3.72e-08
regulation of nucleobase-containing compound metabolic process (GO:0019219)	987	50	108.89	-	0.46	1.52e-07
regulation of primary metabolic process (GO:0080090)	1443	90	159.2	-	0.57	6.47e-07
regulation of nitrogen compound metabolic process (GO:0051171)	1101	62	121.47	-	0.51	1.31e-06
oogenesis (GO:0048477)	627	28	69.18	-	0.4	2.29e-05
female gamete generation (GO:0007292)	634	31	69.95	-	0.44	0.000208
gamete generation (GO:0007276)	853	41	94.11	-	0.44	5.31e-07
single organism reproductive process (GO:0044702)	1006	48	110.99	-	0.43	7.64e-09
reproductive process (GO:0022414)	1140	68	125.77	-	0.54	8.77e-06
reproduction (GO:0000003)	1307	83	144.2	-	0.58	1.31e-05
multicellular organismal reproductive process (GO:0048609)	976	60	107.68	-	0.56	0.000425
multicellular organism reproduction (GO:0032504)	1140	75	125.77	-	0.6	0.000658
sexual reproduction (GO:0019953)	984	60	108.56	-	0.55	0.000275
multi-organism reproductive process (GO:0044703)	984	60	108.56	-	0.55	0.000275
germ cell development (GO:0007281)	725	35	79.99	-	0.44	1.55e-05
cellular process involved in reproduction in multicellular organism (GO:0022412)	787	39	86.83	-	0.45	7.76e-06
developmental process involved in reproduction (GO:0003006)	823	42	90.8	-	0.46	8.96e-06
cell development (GO:0048468)	1392	104	153.58	-	0.68	0.0136
imaginal disc-derived wing morphogenesis (GO:0007476)	339	13	37.4	-	0.35	0.00827
imaginal disc-derived appendage morphogenesis (GO:0035114)	396	18	43.69	-	0.41	0.0193
appendage morphogenesis (GO:0035107)	399	18	44.02	-	0.41	0.0157
anatomical structure morphogenesis (GO:0009653)	1657	121	182.81	-	0.66	0.000398
appendage development (GO:0048736)	405	18	44.68	-	0.4	0.0104
imaginal disc-derived appendage development (GO:0048737)	400	18	44.13	-	0.41	0.0147
post-embryonic appendage morphogenesis (GO:0035120)	389	17	42.92	-	0.4	0.0123
wing disc morphogenesis (GO:0007472)	344	13	37.95	-	0.34	0.00567
animal organ development (GO:0048513)	1278	93	141	-	0.66	0.0113
imaginal disc development (GO:0007444)	627	37	69.18	-	0.53	0.0295
epithelium development (GO:0060429)	1029	60	113.53	-	0.53	2.2e-05
tissue development (GO:0009888)	1107	73	122.13	-	0.6	0.0011
tube development (GO:0035295)	764	43	84.29	-	0.51	0.00073
epithelial tube morphogenesis (GO:0060562)	529	26	58.36	-	0.45	0.00294
tube morphogenesis (GO:0035239)	560	29	61.78	-	0.47	0.00469
morphogenesis of an epithelium (GO:0002009)	651	31	71.82	-	0.43	6.73e-05
tissue morphogenesis (GO:0048729)	664	31	73.26	-	0.42	2.79e-05
regionalization (GO:0003002)	451	17	49.76	-	0.34	0.00013
pattern specification process (GO:0007389)	487	19	53.73	-	0.35	7.4e-05
regulation of cell differentiation (GO:0045595)	284	10	31.33	-	0.32	0.0201
cell division (GO:0051301)	231	7	25.49	-	0.27	0.0377
embryonic morphogenesis (GO:0048598)	235	7	25.93	-	0.27	0.027
embryo development (GO:0009790)	496	15	54.72	-	0.27	3.15e-07
transcription, DNA-templated (GO:0006351)	206	5	22.73	-	0.22	0.0205
nucleic acid-templated transcription (GO:0097659)	206	5	22.73	-	0.22	0.0205
RNA biosynthetic process (GO:0032774)	208	5	22.95	-	0.22	0.0171
RNA metabolic process (GO:0016070)	666	16	73.48	-	0.22	4.21e-13
nucleic acid metabolic process (GO:0090304)	887	20	97.86	-	0.2	2.89e-19
protein modification by small protein conjugation or removal (GO:0070647)	207	5	22.84	-	0.22	0.0187
cellular protein modification process (GO:0006464)	904	44	99.74	-	0.44	2.33e-07
protein modification process (GO:0036211)	904	44	99.74	-	0.44	2.33e-07
macromolecule modification (GO:0043412)	957	46	105.58	-	0.44	3.71e-08
peptidyl-amino acid modification (GO:0018193)	213	5	23.5	-	0.21	0.011
mRNA splicing, via spliceosome (GO:0000398)	189	4	20.85	-	< 0.2	0.0204
mRNA processing (GO:0006397)	240	5	26.48	-	< 0.2	0.000945
RNA processing (GO:0006396)	360	10	39.72	-	0.25	3.87e-05
mRNA metabolic process (GO:0016071)	280	6	30.89	-	< 0.2	0.000121
RNA splicing, via transesterification reactions with bulged adenosine as nucleophile (GO:0000377)	189	4	20.85	-	< 0.2	0.0204
RNA splicing, via transesterification reactions (GO:0000375)	192	4	21.18	-	< 0.2	0.0155
RNA splicing (GO:0008380)	201	4	22.18	-	< 0.2	0.00673
establishment or maintenance of cell polarity (GO:0007163)	200	4	22.07	-	< 0.2	0.00738
negative regulation of transcription, DNA-templated (GO:0045892)	246	4	27.14	-	< 0.2	9.44e-05
negative regulation of cellular macromolecule biosynthetic process (GO:2000113)	307	9	33.87	-	0.27	0.000901
negative regulation of cellular biosynthetic process (GO:0031327)	316	12	34.86	-	0.34	0.016
negative regulation of cellular metabolic process (GO:0031324)	430	17	47.44	-	0.36	0.000634
negative regulation of metabolic process (GO:0009892)	496	26	54.72	-	0.48	0.024
negative regulation of biological process (GO:0048519)	1086	66	119.82	-	0.55	4.83e-05
negative regulation of cellular process (GO:0048523)	957	51	105.58	-	0.48	2.32e-06
negative regulation of biosynthetic process (GO:0009890)	316	12	34.86	-	0.34	0.016
negative regulation of macromolecule biosynthetic process (GO:0010558)	307	9	33.87	-	0.27	0.000901
negative regulation of macromolecule metabolic process (GO:0010605)	481	24	53.07	-	0.45	0.0124
negative regulation of nucleic acid-templated transcription (GO:1903507)	246	4	27.14	-	< 0.2	9.44e-05
negative regulation of RNA biosynthetic process (GO:1902679)	246	4	27.14	-	< 0.2	9.44e-05
negative regulation of RNA metabolic process (GO:0051253)	260	4	28.69	-	< 0.2	2.43e-05
negative regulation of nucleobase-containing compound metabolic process (GO:0045934)	276	5	30.45	-	< 0.2	3.26e-05
negative regulation of nitrogen compound metabolic process (GO:0051172)	333	12	36.74	-	0.33	0.00434
DNA packaging (GO:0006323)	143	2	15.78	-	< 0.2	0.0495
DNA conformation change (GO:0071103)	155	2	17.1	-	< 0.2	0.0151
chromosome organization (GO:0051276)	606	33	66.86	-	0.49	0.00598
spindle organization (GO:0007051)	154	2	16.99	-	< 0.2	0.0167
microtubule cytoskeleton organization (GO:0000226)	339	8	37.4	-	0.21	1.33e-05
single-organism organelle organization (GO:1902589)	697	36	76.9	-	0.47	0.00022
microtubule-based process (GO:0007017)	449	9	49.54	-	< 0.2	2.69e-09
cell cycle process (GO:0022402)	665	9	73.37	-	< 0.2	1.52e-18
cell cycle (GO:0007049)	716	13	78.99	-	< 0.2	2.33e-17
embryonic development via the syncytial blastoderm (GO:0001700)	180	2	19.86	-	< 0.2	0.00123
embryo development ending in birth or egg hatching (GO:0009792)	185	2	20.41	-	< 0.2	0.000741
detection of chemical stimulus (GO:0009593)	132	1	14.56	-	< 0.2	0.0184
DNA repair (GO:0006281)	134	1	14.78	-	< 0.2	0.0149
DNA metabolic process (GO:0006259)	241	4	26.59	-	< 0.2	0.000153
cellular response to DNA damage stimulus (GO:0006974)	281	5	31	-	< 0.2	2.02e-05
cellular response to stress (GO:0033554)	509	28	56.16	-	0.5	0.0493
regulation of mitotic cell cycle phase transition (GO:1901990)	139	1	15.34	-	< 0.2	0.00885
regulation of cell cycle phase transition (GO:1901987)	139	1	15.34	-	< 0.2	0.00885
regulation of cell cycle process (GO:0010564)	189	4	20.85	-	< 0.2	0.0204
regulation of cell cycle (GO:0051726)	325	10	35.86	-	0.28	0.00074
regulation of mitotic cell cycle (GO:0007346)	213	2	23.5	-	< 0.2	4.22e-05
mitotic sister chromatid segregation (GO:0000070)	148	1	16.33	-	< 0.2	0.00344
mitotic cell cycle (GO:0000278)	523	9	57.7	-	< 0.2	2.24e-12
sister chromatid segregation (GO:0000819)	162	1	17.87	-	< 0.2	0.000785
nuclear chromosome segregation (GO:0098813)	210	2	23.17	-	< 0.2	5.75e-05
chromosome segregation (GO:0007059)	224	3	24.71	-	< 0.2	0.000118
mitotic nuclear division (GO:0007067)	267	3	29.46	-	< 0.2	1.57e-06
mitotic cell cycle process (GO:1903047)	473	6	52.18	-	< 0.2	8.38e-13
nuclear division (GO:0000280)	407	7	44.9	-	< 0.2	4.28e-09
organelle fission (GO:0048285)	413	8	45.57	-	< 0.2	1.44e-08
mitotic spindle organization (GO:0007052)	203	1	22.4	-	< 0.2	9.93e-06

## Sheet: Table S3 overrep_MF
	ion channel	cuticle	redox	other
Analysis Type:	PANTHER Overrepresentation Test (release 20160715)
Annotation Version and Release Date:	GO Ontology database Released 2016-06-22
Analyzed List:	enrichment_test_input.csv (Drosophila melanogaster)
Reference List:	control_genes (Drosophila melanogaster)
Bonferroni correction:	TRUE
GO molecular function complete	control_genes - REFLIST (12753)	enrichment_test_input.csv (1407)	enrichment_test_input.csv (expected)	enrichment_test_input.csv (over/under)	enrichment_test_input.csv (fold Enrichment)	enrichment_test_input.csv (P-value)
voltage-gated potassium channel activity (GO:0005249)	21	12	2.32	+	5.18	0.00656
voltage-gated cation channel activity (GO:0022843)	29	17	3.2	+	5.31	5.7e-05
cation channel activity (GO:0005261)	111	34	12.25	+	2.78	0.000234
cation transmembrane transporter activity (GO:0008324)	322	78	35.53	+	2.2	3.04e-07
ion transmembrane transporter activity (GO:0015075)	456	97	50.31	+	1.93	1.73e-06
substrate-specific transmembrane transporter activity (GO:0022891)	576	113	63.55	+	1.78	6.38e-06
substrate-specific transporter activity (GO:0022892)	632	119	69.73	+	1.71	2.29e-05
transporter activity (GO:0005215)	782	137	86.28	+	1.59	0.000122
transmembrane transporter activity (GO:0022857)	670	122	73.92	+	1.65	8.97e-05
ion channel activity (GO:0005216)	210	48	23.17	+	2.07	0.00388
substrate-specific channel activity (GO:0022838)	215	49	23.72	+	2.07	0.00333
channel activity (GO:0015267)	224	49	24.71	+	1.98	0.0097
passive transmembrane transporter activity (GO:0022803)	224	49	24.71	+	1.98	0.0097
voltage-gated ion channel activity (GO:0005244)	38	20	4.19	+	4.77	2.26e-05
voltage-gated channel activity (GO:0022832)	38	20	4.19	+	4.77	2.26e-05
gated channel activity (GO:0022836)	155	42	17.1	+	2.46	0.000243
potassium channel activity (GO:0005267)	27	13	2.98	+	4.36	0.0164
potassium ion transmembrane transporter activity (GO:0015079)	43	18	4.74	+	3.79	0.00285
metal ion transmembrane transporter activity (GO:0046873)	188	48	20.74	+	2.31	0.00019
inorganic cation transmembrane transporter activity (GO:0022890)	257	66	28.35	+	2.33	7.74e-07
monovalent inorganic cation transmembrane transporter activity (GO:0015077)	200	52	22.07	+	2.36	3.37e-05
structural constituent of ribosome (GO:0003735)	172	61	18.98	+	3.21	9.12e-12
structural molecule activity (GO:0005198)	492	123	54.28	+	2.27	1.73e-13
structural constituent of chitin-based larval cuticle (GO:0008010)	104	35	11.47	+	3.05	1.68e-05
structural constituent of chitin-based cuticle (GO:0005214)	136	41	15	+	2.73	2.1e-05
structural constituent of cuticle (GO:0042302)	141	43	15.56	+	2.76	6.9e-06
oxidoreductase activity (GO:0016491)	534	103	58.91	+	1.75	6.97e-05
Unclassified (UNCLASSIFIED)	2690	328	296.78	+	1.11	0
protein binding (GO:0005515)	1809	144	199.58	-	0.72	0.00659
binding (GO:0005488)	4655	410	513.57	-	0.8	3.73e-06
DNA binding (GO:0003677)	786	53	86.72	-	0.61	0.0481
nucleic acid binding (GO:0003676)	1503	100	165.82	-	0.6	4.62e-06
organic cyclic compound binding (GO:0097159)	2404	204	265.23	-	0.77	0.0112
heterocyclic compound binding (GO:1901363)	2387	202	263.35	-	0.77	0.0101
poly(A) RNA binding (GO:0044822)	226	6	24.93	-	0.24	0.00638
chromatin binding (GO:0003682)	176	3	19.42	-	< 0.2	0.00541

## Sheet: Table S4 enrichment_BP
Analysis Type:	PANTHER Enrichment Test (release 20160715)
Annotation Version and Release Date:	GO Ontology database Released 2016-06-22
Analyzed List:	enrichment_test_input.csv (Drosophila melanogaster)
Bonferroni correction:	TRUE
GO biological process complete	number	overUnder	pvalue
chromatin assembly or disassembly (GO:0006333)	25	-	3.84e-08
chromatin organization (GO:0006325)	32	-	1.14e-06
chromosome organization (GO:0051276)	33	-	2.84e-06
organelle organization (GO:0006996)	127	-	1.89e-05
cellular component organization (GO:0016043)	195	-	0.00402
cellular component organization or biogenesis (GO:0071840)	198	-	0.0037
macromolecular complex subunit organization (GO:0043933)	59	-	1.31e-07
response to bacterium (GO:0009617)	36	+	0.00227
defense response to other organism (GO:0098542)	36	+	0.00597
defense response (GO:0006952)	51	+	0.000236
response to other organism (GO:0051707)	50	+	6.49e-05
response to external biotic stimulus (GO:0043207)	50	+	6.49e-05
response to biotic stimulus (GO:0009607)	50	+	6.49e-05
cellular respiration (GO:0045333)	26	-	0.00659
energy derivation by oxidation of organic compounds (GO:0015980)	29	-	0.0305
cellular process (GO:0009987)	629	-	0.0423
myofibril assembly (GO:0030239)	10	-	0.00997
actomyosin structure organization (GO:0031032)	13	-	0.0246
cellular component assembly involved in morphogenesis (GO:0010927)	13	-	0.00274
metamorphosis (GO:0007552)	46	+	0.0112
proteolysis (GO:0006508)	77	+	0.044
defense
redox
proteolysis

## Sheet: Table S5 enrichment_MF
Analysis Type:	PANTHER Enrichment Test (release 20160715)
Annotation Version and Release Date:	GO Ontology database Released 2016-06-22
Analyzed List:	enrichment_test_input.csv (Drosophila melanogaster)
Bonferroni correction:	TRUE
GO molecular function complete	number	overUnder	pvalue
serine-type endopeptidase activity (GO:0004252)	35	+	3.08e-08
endopeptidase activity (GO:0004175)	47	+	7.73e-07
peptidase activity, acting on L-amino acid peptides (GO:0070011)	72	+	0.00115
peptidase activity (GO:0008233)	72	+	0.00115
serine-type peptidase activity (GO:0008236)	39	+	6.11e-06
serine hydrolase activity (GO:0017171)	39	+	6.11e-06
protein heterodimerization activity (GO:0046982)	32	-	0.000291
protein dimerization activity (GO:0046983)	43	-	0.0107
protein binding (GO:0005515)	144	-	0.00991
proteolysis
